# Supplementary material for: Beyond NICE: Aktualisierte systematische Übersicht zur Evidenzlage der Pubertätsblockade und Hormongabe bei Minderjährigen mit Geschlechtsdysphorie
Source: Atypon-hosted journal article supplement (doi:10.1024/1422-4917/a000972), 2024-02-27

Morningstar M, Thomas P, Anderson AM et al. Exogenous testosterone administration is associated with differential neural response to unfamiliar peer's and own caregiver's voice in transgender adolescents. *Dev Cogn Neurosci*, 2023;59, 101194. <https://doi.org/10.1016/j.dcn.2022.101194>

**2 Step 2: Factors that might cause rating down your certainty**

Indicate in which areas where you find issues. You can indicate areas as problematic without having to rate down. It just helps you to keep track of judgements. The most important rule is to be transparent. When you tick off an item, a standard text suggestion will be added to the comment box.

|                                                               |                                                                                                                                                                                                                                                                                                                                                                                                                                                                                                                                                                                                                                            |
|---------------------------------------------------------------|--------------------------------------------------------------------------------------------------------------------------------------------------------------------------------------------------------------------------------------------------------------------------------------------------------------------------------------------------------------------------------------------------------------------------------------------------------------------------------------------------------------------------------------------------------------------------------------------------------------------------------------------|
| <b>Risiko für Bias</b> <a href="#">Hilfe</a><br>Schwerwiegend | <b>Problem areas</b><br><b>The 6 standard Cochrane RoB items</b><br><input checked="" type="checkbox"/> Sequence generation<br><input checked="" type="checkbox"/> Concealment<br><input checked="" type="checkbox"/> Blinding participants<br><input checked="" type="checkbox"/> Blinding assessors<br><input type="checkbox"/> Incomplete data<br><input type="checkbox"/> Outcome reporting<br><input type="checkbox"/> Intention-to-treat<br><input type="checkbox"/> Carryover effects<br><input type="checkbox"/> Stopped early<br><input type="checkbox"/> Unvalidated measures<br><input checked="" type="checkbox"/> Other Issue |
| <b>Inkonsistenz</b> <a href="#">Hilfe</a><br>Keine            | <b>Problem areas</b><br><input type="checkbox"/> Point estimate variability<br><input type="checkbox"/> CIs not overlapping<br><input type="checkbox"/> Direction not consistent<br><input type="checkbox"/> I <sup>2</sup> high (>60%)<br><input type="checkbox"/> Other Issue                                                                                                                                                                                                                                                                                                                                                            |
| <b>Indirektheit</b> <a href="#">Hilfe</a><br>Keine            | <b>Problem areas</b><br><input type="checkbox"/> Population dissimilarity<br><input type="checkbox"/> Outcome dissimilarity<br><input type="checkbox"/> No direct comparison<br><input type="checkbox"/> Intervention/comparator dissimilarity<br><input type="checkbox"/> Time frame insufficient<br><input type="checkbox"/> Other Issue                                                                                                                                                                                                                                                                                                 |
| <b>Unzureichende Präzision</b> <a href="#">Hilfe</a><br>Keine | <b>Problem areas</b><br><input type="checkbox"/> Wide confidence intervals<br><input type="checkbox"/> Few patients<br><input checked="" type="checkbox"/> Only one study<br><input type="checkbox"/> Other Issue                                                                                                                                                                                                                                                                                                                                                                                                                          |
| <b>Publikationsbias</b> <a href="#">Hilfe</a><br>Keine        | <b>Problem areas</b><br><input type="checkbox"/> Commercially funded<br><input type="checkbox"/> Asymmetrical funnel plot<br><input type="checkbox"/> Incomprehensive search<br><input type="checkbox"/> No gray literature<br><input type="checkbox"/> Unfunded Studies<br><input type="checkbox"/> Discrepancy w. unpublished<br><input type="checkbox"/> Other Issue                                                                                                                                                                                                                                                                    |

**Certainty (GRADE): Low**, due to serious risk of bias (no randomization, no blinding, no measurement of baseline testosterone level and highly skewed variations in exogenous hormone doses and administration duration).

Grannis C., Leibowitz SF, Gahn S et al., 2021. Testosterone treatment, internalizing symptoms, and body image dissatisfaction in transgender boys. *Psychoendocrinology*, 132, 105358. <https://doi.org/10.1016/j.psyneuen.2021.105358>

**2 Step 2: Factors that might cause rating down your certainty**

Indicate in which areas where you find issues. You can indicate areas as problematic without having to rate down. It just helps you to keep track of judgements. The most important rule is to be transparent. When you tick off an item, a standard text suggestion will be added to the comment box.

|                                                                   |                                                                                                                                                                                                                                                                                                                                                                                                                                                                                                                                                                                                                                                                                     |
|-------------------------------------------------------------------|-------------------------------------------------------------------------------------------------------------------------------------------------------------------------------------------------------------------------------------------------------------------------------------------------------------------------------------------------------------------------------------------------------------------------------------------------------------------------------------------------------------------------------------------------------------------------------------------------------------------------------------------------------------------------------------|
| <p>Risiko für Bias <a href="#">Hilfe</a></p> <p>Schwerwiegend</p> | <p>Problem areas</p> <p>The 6 standard Cochrane RoB items</p> <p><input checked="" type="checkbox"/> Sequence generation</p> <p><input checked="" type="checkbox"/> Concealment</p> <p><input checked="" type="checkbox"/> Blinding participants</p> <p><input checked="" type="checkbox"/> Blinding assessors</p> <p><input type="checkbox"/> Incomplete data</p> <p><input type="checkbox"/> Outcome reporting</p> <p><input type="checkbox"/> Intention-to-treat</p> <p><input type="checkbox"/> Carryover effects</p> <p><input type="checkbox"/> Stopped early</p> <p><input type="checkbox"/> Unvalidated measures</p> <p><input checked="" type="checkbox"/> Other Issue</p> |
| <p>Inkonsistenz <a href="#">Hilfe</a></p> <p>Keine</p>            | <p>Problem areas</p> <p><input type="checkbox"/> Point estimate variability</p> <p><input type="checkbox"/> CIs not overlapping</p> <p><input type="checkbox"/> Direction not consistent</p> <p><input type="checkbox"/> I<sup>2</sup> high (&gt;60%)</p> <p><input type="checkbox"/> Other Issue</p>                                                                                                                                                                                                                                                                                                                                                                               |
| <p>Indirektheit <a href="#">Hilfe</a></p> <p>Keine</p>            | <p>Problem areas</p> <p><input type="checkbox"/> Population dissimilarity</p> <p><input type="checkbox"/> Outcome dissimilarity</p> <p><input type="checkbox"/> No direct comparison</p> <p><input type="checkbox"/> Intervention/comparator dissimilarity</p> <p><input type="checkbox"/> Time frame insufficient</p> <p><input type="checkbox"/> Other Issue</p>                                                                                                                                                                                                                                                                                                                  |
| <p>Unzureichende Präzision <a href="#">Hilfe</a></p> <p>Keine</p> | <p>Problem areas</p> <p><input type="checkbox"/> Wide confidence intervals</p> <p><input type="checkbox"/> Few patients</p> <p><input checked="" type="checkbox"/> Only one study</p> <p><input type="checkbox"/> Other Issue</p>                                                                                                                                                                                                                                                                                                                                                                                                                                                   |
| <p>Publikationsbias <a href="#">Hilfe</a></p> <p>Keine</p>        | <p>Problem areas</p> <p><input type="checkbox"/> Commercially funded</p> <p><input type="checkbox"/> Asymmetrical funnel plot</p> <p><input type="checkbox"/> Incomprehensive search</p> <p><input type="checkbox"/> No gray literature</p> <p><input type="checkbox"/> Unfunded Studies</p> <p><input type="checkbox"/> Discrepancy w. unpublished</p> <p><input type="checkbox"/> Other Issue</p>                                                                                                                                                                                                                                                                                 |

**Certainty (GRADE): Low**, due to serious risk of bias (no randomization, no blinding, possible bias due to self-reported outcome measures and knowledge about treatment.)

### Risk of Bias-Assessment (ROB-II)

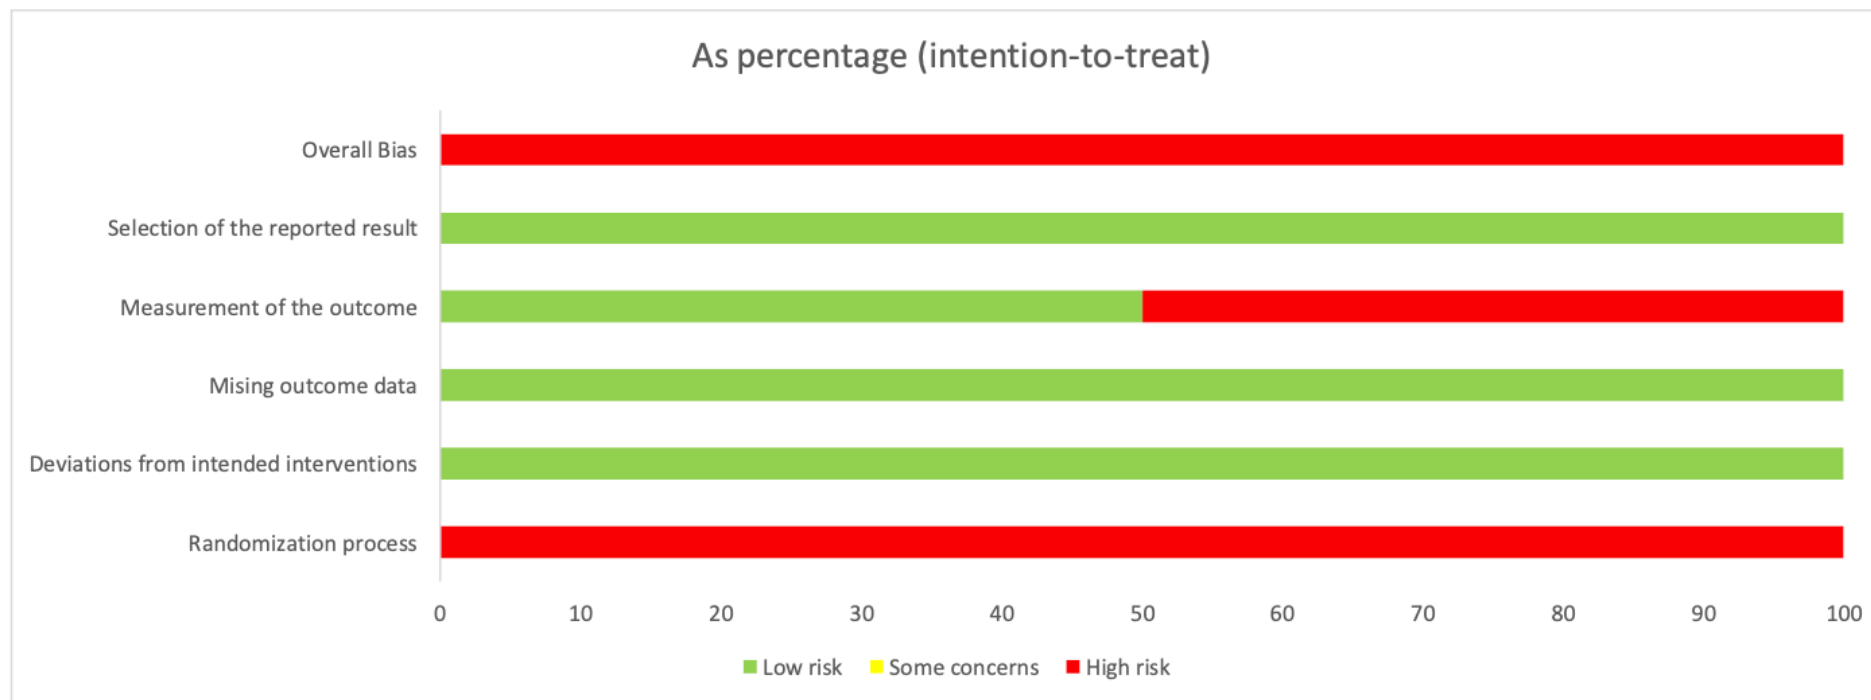

Supplement: 1422-4917_a000972_esm4.pdf [file 1422-4917_a000972_esm4.pdf]
