# Supplementary material for: Beyond NICE: Aktualisierte systematische Übersicht zur Evidenzlage der Pubertätsblockade und Hormongabe bei Minderjährigen mit Geschlechtsdysphorie
Source: Atypon-hosted journal article supplement (doi:10.1024/1422-4917/a000972), 2024-02-27
Supplement: 1422-4917_a000972_esm3.pdf [file 1422-4917_a000972_esm3.pdf]

## ELECTRONIC SUPPLEMENTARY ONLINE MATERIALS III

### X Reasons for exclusion – Full-text screening

#### X.1 CSH + PB

| Study reference                                                                                                                                                                                                                               | Reason for exclusion                                                                                                                                          |
|-----------------------------------------------------------------------------------------------------------------------------------------------------------------------------------------------------------------------------------------------|---------------------------------------------------------------------------------------------------------------------------------------------------------------|
| (2021). "Health Care for Transgender and Gender Diverse Individuals: ACOG Committee Opinion, Number 823." <u>Obstetrics and Gynecology</u> 137(3): E75-E88.                                                                                   | Not relevant design:<br>Review article                                                                                                                        |
| Aldridge, Z., et al. (2022). "Understanding factors that affect wellbeing in trans people "later" in transition: a qualitative study." <u>Quality of Life Research</u> 31(9): 2695-2703.                                                      | Not relevant population/design/comparison:<br>Participants over the age of 18 assessed;<br>retrospective; no comparison group (with at least no intervention) |
| Arnoldussen, M., et al. (2022). "Self-Perception of Transgender Adolescents After Gender-Affirming Treatment: A Follow-Up Study into Young Adulthood." 9(4): 238–246.                                                                         | Not relevant design:<br>Observational trial; no comparison group (with at least no intervention)                                                              |
| Ashley, F., et al. (2023). "Randomized-controlled trials are methodologically inappropriate in adolescent transgender healthcare." <u>International Journal of Transgender Health</u> .                                                       | Not relevant design:<br>Review article                                                                                                                        |
| Barron, S., et al. (2023). "Gender affirming top surgery in transmale vs. gender nonconforming patients: Does gender identity affect patient-reported outcomes?" <u>Journal of Plastic, Reconstructive and Aesthetic Surgery</u> 85: 182-186. | Not relevant intervention:<br>Patients who underwent gender-affirming double-incision mastectomies within one institution (2014–2019) were queried            |
| Bauer, G. R., et al. (2021). "Transgender youth referred to clinics for gender-affirming medical care in Canada." <u>Pediatrics</u> 148(5).                                                                                                   | Not relevant design/comparison:<br>Observational trial; no comparison group (with at least no intervention)                                                   |
| Biggs, M. (2023). "The Dutch Protocol for Juvenile Transsexuals: Origins and Evidence." <u>Journal of sex &amp; marital therapy</u> 49(4): 348-368.                                                                                           | Not relevant design:<br>Overview article                                                                                                                      |
| Boogers, L. S., et al. (2022). "Transgender Girls Grow Tall: Adult Height Is Unaffected by GnRH Analogue and Estradiol Treatment." 107(9): e3805-e3815.                                                                                       | Not relevant design:<br>Observational trial; no comparison group (with at least no intervention)                                                              |
| Boyer, T. L., et al. (2022). "State of transgender health education and provision of gender-affirming care to transgender and gender diverse adolescents." <u>Journal of Adolescent Health</u> 71(6): 769-770.                                | Not relevant design:<br>Author response                                                                                                                       |
| Call, D. C., et al. (2021). "Providing Affirmative Care to Transgender and Gender Diverse Youth: Disparities, Interventions, and Outcomes." <u>Current Psychiatry Reports</u> 23(6).                                                          | Not relevant design:<br>Review article                                                                                                                        |
| Cantu, A. L., et al. (2020). "Changes in Anxiety and Depression from Intake to First Follow-Up among Transgender Youth in a Pediatric Endocrinology Clinic." <u>Transgender Health</u> 5(3): 196-200.                                         | Not relevant design:<br>No comparison group (with at least no intervention)                                                                                   |
| Chen, D., et al. (2021). "Psychosocial characteristics of transgender youth seeking gender-affirming medical treatment: Baseline findings from the Trans Youth Care Study." <u>Journal of Adolescent Health</u> 68(6): 1104-1111.             | Not relevant design:<br>Observational trial; no comparison group (with at least no intervention)                                                              |
| Ciancia, S., et al. (2022). "Impact of gender-affirming treatment on bone health in transgender                                                                                                                                               | Not relevant design:<br>Review article                                                                                                                        |

|                                                                                                                                                                                                                                                                           |                                                                                                  |
|---------------------------------------------------------------------------------------------------------------------------------------------------------------------------------------------------------------------------------------------------------------------------|--------------------------------------------------------------------------------------------------|
| and gender diverse youth." <u>Endocrine Connections</u> 11(11).                                                                                                                                                                                                           |                                                                                                  |
| Claahsen - van der Grinten, H., et al. (2021). "Gender incongruence and gender dysphoria in childhood and adolescence—current insights in diagnostics, management, and follow-up." <u>European Journal of Pediatrics</u> 180(5): 1349-1357.                               | Not relevant design:<br>Review article                                                           |
| Conflitti, A. C., et al. (2023). "Update on bioethical, medical and fertility issues in gender incongruence during transition age." <u>Journal of Endocrinological Investigation</u> 46(9): 1725-1736.                                                                    | Not relevant design:<br>Review article                                                           |
| De Nie, I., et al. (2022). "Histological study on the influence of puberty suppression and hormonal treatment on developing germ cells in transgender women." <u>Human Reproduction</u> 37(2): 297-308.                                                                   | Not relevant population; participants > 18 years of age                                          |
| Fisher, A. D., et al. (2021). Gender Dysphoria: Management in the Transition age: 255-264.                                                                                                                                                                                | Not relevant Design                                                                              |
| Hruz, P. W. (2020). Deficiencies in Scientific Evidence for Medical Management of Gender Dysphoria. 87(1), 34–42.                                                                                                                                                         | Not relevant design (narrative review)                                                           |
| Jackson, D. (2023). "Suicide-Related Outcomes Following Gender-Affirming Treatment: A Review. [Review]." 15(3): e36425.                                                                                                                                                   | Not relevant Design: Review article                                                              |
| Jessen, R. S., et al. (2021). "Navigating in the dark: Meta-synthesis of subjective experiences of gender dysphoria amongst transgender and gender non-conforming youth." <u>Social Science &amp; Medicine</u> 281.                                                       | Not relevant Design: Meta-Analysis of qualitative studies                                        |
| Jessen, R. S., et al. (2021). "Negotiating gender in everyday life: Toward a conceptual model of gender dysphoria in adolescents." <u>Archives of Sexual Behavior</u> 50(8): 3489-3503.                                                                                   | Not relevant Design: Qualitative study                                                           |
| Jones, J. T., et al. (2022). "Gender dysphoria in adolescents with Ehlers–Danlos syndrome." <u>SAGE Open Medicine</u> 10.                                                                                                                                                 | Not relevant information: No information regarding GD-treatment                                  |
| Kain, E. J., et al. (2023). "A Retrospective Study of the Use of Gonadotropin-Releasing Hormone Analogs and Testosterone in Transgender Boys: Who, What, When, and for How Long?" <u>Transgender Health</u> .                                                             | Not relevant Design                                                                              |
| Karakılıç Özturan, E., et al. (2023). "Endocrinological Approach to Adolescents with Gender Dysphoria: Experience of a Pediatric Endocrinology Department in a Tertiary Center in Turkey." <u>Journal of clinical research in pediatric endocrinology</u> 15(3): 276-284. | Not relevant design:<br>Observational trial; no comparison group (with at least no intervention) |
| Karvonen, M., et al. (2022). "The nature of comorbid psychopathology in adolescents with gender dysphoria." <u>Psychiatry Research</u> 317.                                                                                                                               | Not relevant population                                                                          |
| Kearns, S., et al. (2023). "Transgender and non-binary demographics, referrals, and comorbidities among young Irish adults (2014-2020)." 192(4): 1679–1685.                                                                                                               | Not relevant population                                                                          |
| Ker, A., et al. (2021). "'A little bubble of utopia': Constructions of a primary care-based pilot clinic providing gender affirming hormone therapy." <u>Health Sociology Review</u> 30(1): 25-40.                                                                        | Not relevant Design: No clinical study                                                           |
| Klinger, D., et al. (2023). "Mental Health of Transgender Youth: A Comparison of Assigned Female at Birth and Assigned Male at Birth Individuals." <u>Journal of Clinical Medicine</u> 12(14).                                                                            | Not relevant Design: Comparison between groups before start of gender affirming treatment        |

|                                                                                                                                                                                                                                                             |                                                                                   |
|-------------------------------------------------------------------------------------------------------------------------------------------------------------------------------------------------------------------------------------------------------------|-----------------------------------------------------------------------------------|
| Krebs, D., et al. (2022). "Care for Transgender Young People." <u>Hormone research in paediatrics</u> 95(5): 405-414.                                                                                                                                       | Not relevant Design: review article                                               |
| Kyriakou, A., et al. (2020). "Current approach to the clinical care of adolescents with gender dysphoria. [Review]." 91(1): 165–175.                                                                                                                        | Not relevant Design: review article                                               |
| Lavender, R., et al. (2023). "Impact of Hormone Treatment on Psychosocial Functioning in Gender-Diverse Young People." <u>LGBT health</u> 10(5): 382-390.                                                                                                   | Full text paper not available                                                     |
| Lee, J. Y. (2023). "Bone Health in the Transgender and Gender Diverse Youth Population." <u>Current Osteoporosis Reports</u> 21(4): 459-471.                                                                                                                | Not relevant Design: review article                                               |
| Lee, J. Y. and S. M. Rosenthal (2023). Gender-Affirming Care of Transgender and Gender-Diverse Youth: Current Concepts. 74: 107-116.                                                                                                                        | Not relevant Design: review article                                               |
| Lee, J. Y., et al. (2022). "Interpretation of Bone Mineral Density Z-Scores by Dual-Energy X-Ray Absorptiometry in Transgender and Gender Diverse Youth Prior to Gender-Affirming Medical Therapy." <u>Journal of Clinical Densitometry</u> 25(4): 559-568. | No relevant intervention: Data collected before starting treatment                |
| Lee, J. Y., et al. (2020). "Low bone mineral density in early pubertal transgender/gender diverse youth: Findings from the trans youth care study." <u>Journal of the Endocrine Society</u> 4(9).                                                           | No relevant intervention: Data collected before starting treatment                |
| Lehmann, K., et al. (2021). "Dramaturgical Accounts of Transgender Individuals: Impression Management in the Presentation of Self to Specialist Gender Services." <u>Archives of Sexual Behavior</u> 50(8): 3539-3549.                                      | No relevant Design, No relevant intervention                                      |
| Levine, S. B., et al. (2022). "Reconsidering Informed Consent for Trans-Identified Children, Adolescents, and Young Adults." <u>Journal of sex &amp; marital therapy</u> 48(7): 706-727.                                                                    | No relevant Design: Commentary                                                    |
| Ludvigsson, J. F., et al. (2023). "A systematic review of hormone treatment for children with gender dysphoria and recommendations for research." <u>Acta Paediatrica, International Journal of Paediatrics</u> .                                           | Not relevant Design: Review                                                       |
| Macenski, C. L., et al. (2022). "(In)equality and beyond: Achieving justice in gender-affirming hormone initiation." <u>Harvard Review of Psychiatry</u> 30(6): 369-372.                                                                                    | Not relevant Design: Review                                                       |
| Malone, W., et al. (2021). "Puberty blockers for gender dysphoria: the science is far from settled." 5(9): e33-e34.                                                                                                                                         | Not relevant design: Overview article                                             |
| Marwa, A., et al. (2022). "Determinants of Bone Mineral Density in Transgender Youth." <u>Transgender Health</u> 7(3): 213-218.                                                                                                                             | Not relevant Design: retrospective cohort study, comparison between AMAB and AFAB |
| Masic, U., et al. (2022). "Trajectories of transgender adolescents referred for endocrine intervention in England." <u>Archives of Disease in Childhood</u> 107(11): 1012-1017.                                                                             | Not relevant Design: report of cohort trajectories                                |
| Mason, A., et al. (2023). "Gender Dysphoria in Young People: A Model of Chronic Stress." <u>Hormone research in paediatrics</u> 96(1): 54-65.                                                                                                               | Not relevant Design: Review article, No relevant intervention                     |
| McCallion, S., et al. (2021). "An appraisal of current service delivery and future models of care for young people with gender dysphoria." <u>European Journal of Pediatrics</u> 180(9): 2969-2976.                                                         | Not relevant Design: Review article                                               |

|                                                                                                                                                                                                                                                                                                            |                                                                                                                                                                                                                                                                     |
|------------------------------------------------------------------------------------------------------------------------------------------------------------------------------------------------------------------------------------------------------------------------------------------------------------|---------------------------------------------------------------------------------------------------------------------------------------------------------------------------------------------------------------------------------------------------------------------|
| McKenna, J. L., et al. (2023). "Gender-affirming mental health care for transgender and gender diverse youth on pediatric inpatient psychiatry units." <u>Journal of the American Academy of Child &amp; Adolescent Psychiatry</u> .                                                                       | Not relevant Design: Review article                                                                                                                                                                                                                                 |
| Meyer, G., et al. (2020). "Safety and rapid efficacy of guideline-based gender-affirming hormone therapy: an analysis of 388 individuals diagnosed with gender dysphoria." 182(2): 149–156.                                                                                                                | Not relevant Outcome: only baseline characteristics reported                                                                                                                                                                                                        |
| Micangeli, G., et al. (2023). "The role of the pediatrician in the management of the child and adolescent with gender dysphoria." <u>Italian Journal of Pediatrics</u> 49(1).                                                                                                                              | Not relevant Design: review article                                                                                                                                                                                                                                 |
| Millington, K., et al. (2020). "Physiological and metabolic characteristics of a cohort of transgender and gender-diverse youth in the United States." <u>Journal of Adolescent Health</u> 67(3): 376-383.                                                                                                 | Not relevant Design: cohort study comparing GD                                                                                                                                                                                                                      |
| Perl, L., et al. (2020). "Blood Pressure Dynamics After Pubertal Suppression with Gonadotropin-Releasing Hormone Analogs Followed by Testosterone Treatment in Transgender Male Adolescents: A Pilot Study." <u>LGBT health</u> 7(6): 340–344.                                                             | Not relevant design: Observational trial; no comparison group (with at least no intervention)                                                                                                                                                                       |
| Perl et al. (2021), Blood pressure dynamics after pubertal suppression with gonadotropin-releasing hormone analogs followed by estradiol treatment in transgender female adolescents: a pilot study, doi: 10.1515/jpem-2021-0172                                                                           | Not relevant design: Observational trial; no comparison group (with at least no intervention)                                                                                                                                                                       |
| Schagen, S. E. E., et al. (2020). "Bone development in transgender adolescents treated with gnrh analogues and subsequent gender-affirming hormones." <u>Journal of Clinical Endocrinology and Metabolism</u> 105(12).                                                                                     | Not relevant design: Observational trial; no comparison group (with at least no intervention)                                                                                                                                                                       |
| Tanaudommongkon, A., et al. (2022). "Population pharmacokinetics of tenofovir, emtricitabine and intracellular metabolites in transgender women." <u>British Journal of Clinical Pharmacology</u> 88(8): 3674-3682.                                                                                        | Not relevant design: No comparison group; 8 transgender women and 8 cisgender men were enrolled in a phase 1, open-label PK study of once daily tenofovir disoproxil fumarate 300 mg/ emtricitabine 200 mg under direct observation in a research clinic for 8 days |
| Tangpricha, V. (2022). "Gender-affirming Hormone Therapy and Risk of Diabetes in Transgender Persons." <u>Journal of Clinical Endocrinology and Metabolism</u> 107(6): E2632-E2633.                                                                                                                        | Not relevant design: Commentary                                                                                                                                                                                                                                     |
| Taylor, J., et al. (2023). "Sexual & reproductive health information on minor consent forms for pubertal suppression and gender affirming hormones." 5: 1071212.                                                                                                                                           | Not relevant design: Survey on (publicly available) informed consent forms for pubertal suppression and gender affirming hormones                                                                                                                                   |
| Thompson, L., et al. (2023). "A PRISMA systematic review of adolescent gender dysphoria literature: 3) treatment." 3(8): e0001478.                                                                                                                                                                         | Not relevant design: PRISMA systematic review                                                                                                                                                                                                                       |
| Tordoff, D. M., et al. (2022). "Mental Health Outcomes in Transgender and Nonbinary Youths Receiving Gender-Affirming Care." <u>JAMA network open</u> 5(2).                                                                                                                                                | Not relevant design: Observational trial; no comparison group (with at least no intervention)                                                                                                                                                                       |
| van der Loos, M. A. T. C., et al. (2021). "Development of Hip Bone Geometry During Gender-Affirming Hormone Therapy in Transgender Adolescents Resembles That of the Experienced Gender When Pubertal Suspension Is Started in Early Puberty." <u>Journal of Bone and Mineral Research</u> 36(5): 931–941. | Not relevant design: Observational trial; no comparison group (with at least no intervention)                                                                                                                                                                       |

|                                                                                                                                                                                 |                                             |
|---------------------------------------------------------------------------------------------------------------------------------------------------------------------------------|---------------------------------------------|
| Willemsen, L. A., et al. (2023). "Just as Tall on Testosterone; a Neutral to Positive Effect on Adult Height of GnRHa and Testosterone in Trans Boys." <i>108(2)</i> : 414–421. | Not relevant design:<br>Observational trial |
|---------------------------------------------------------------------------------------------------------------------------------------------------------------------------------|---------------------------------------------|

## X.2 CSH

| Study reference                                                                                                                                                                                               | Reason for exclusion                                                                                                              |
|---------------------------------------------------------------------------------------------------------------------------------------------------------------------------------------------------------------|-----------------------------------------------------------------------------------------------------------------------------------|
| Achille, C., et al. (2020). "Longitudinal impact of gender-affirming endocrine intervention on the mental health and well-being of transgender youths: preliminary results." <i>020</i> : 8.                  | Not relevant design:<br>Observational trial; no comparison group (with at least no intervention)                                  |
| Aldridge, Z., et al. (2021). "Long-term effect of gender-affirming hormone treatment on depression and anxiety symptoms in transgender people: A prospective cohort study." <i>Andrology</i> 9(6): 1808–1816. | Not relevant design:<br>Observational trial; no comparison group (with at least no intervention)                                  |
| Baker, K. E., et al. (2021). "Hormone Therapy, Mental Health, and Quality of Life Among Transgender People: A Systematic Review. [Review]." <i>5(4)</i> : bvab011.                                            | Not relevant design:<br>Review article                                                                                            |
| Boogers, L. S., et al. (2023). "The dose-dependent effect of estrogen on bone mineral density in trans girls." <i>189(2)</i> : 290–296.                                                                       | Not relevant design:<br>Observational trial; no comparison group (with at least no intervention)                                  |
| Bubley, J. A., et al. (2020). "Angiofibroma stimulation in a transgender person receiving gender-affirming testosterone." <i>JAAD Case Reports</i> 6(10): 1101-1103.                                          | Not relevant design/comparison:<br>Case report                                                                                    |
| Campbell, C. E., et al. (2022). "Associations between testosterone, estradiol, and androgen receptor genotype with amygdala subregions in adolescents." <i>Psychoneuroendocrinology</i> 137: 1-11.            | Not relevant population:<br>Cross-sectional data was collected from 297 (healthy) adolescents (n = 137 / 46% females, ages 10–17) |
| Chen, D., et al. (2023). "Psychosocial Functioning in Transgender Youth after 2 Years of Hormones." <i>New England Journal of Medicine</i> 388(3): 240-250.                                                   | Not relevant design:<br>Observational trial; no comparison group (with at least no intervention)                                  |
| Cirincione, L. R., et al. (2022). "Oral estrogen leads to falsely low concentrations of estradiol in a common immunoassay." <i>Endocrine Connections</i> 11(2).                                               | Not relevant population:<br>89 transgender women                                                                                  |
| Cunha, F. S., et al. (2023). "Arterial Stiffness in Transgender Men Receiving Long-term Testosterone Therapy." <i>Journal of the Endocrine Society</i> 7(5).                                                  | Not relevant population:<br>Thirty-three Transmen (TM); mean age of the TM group was 44 ± 10 years (range 26-61 years)            |
| D'Hoore, L. and G. T'Sjoen (2022). "Gender-affirming hormone therapy: An updated literature review with an eye on the future." <i>Journal of Internal Medicine</i> 291(5): 574-592.                           | Not relevant Design: Review article                                                                                               |
| Das, R. K. and S. B. Dusetzina (2023). "Gender-Affirming Hormone Therapy Spending and Use in the USA, 2013–2019." <i>Journal of General Internal Medicine</i> 38(1): 260-262.                                 | Not relevant Design; Results only reported for general GD population (including >18 yo age)                                       |
| De, N., I, et al. (2022). "Incidence of testicular cancer in trans women using gender-affirming hormonal treatment: a nationwide cohort study." <i>129(4)</i> : 491–497.                                      | Not relevant population; participants > 18 years of age                                                                           |
| Dubin, S., et al. (2020). "Medically assisted gender affirmation: when children and parents disagree." <i>Journal of medical ethics</i> 46(5): 295-299.                                                       | Not relevant Design: Commentary                                                                                                   |
| Durcan, E., et al. (2022). "TransCOVID: Does Gender-Affirming Hormone Therapy Play a Role in                                                                                                                  | Not relevant Design: Observational study, No comparison group                                                                     |



|                                                                                                                                                                                                                                                                          |                                                                                                                                                                    |
|--------------------------------------------------------------------------------------------------------------------------------------------------------------------------------------------------------------------------------------------------------------------------|--------------------------------------------------------------------------------------------------------------------------------------------------------------------|
| Contracting COVID-19?" <u>Journal of sex &amp; marital therapy</u> 48(4): 415-426.                                                                                                                                                                                       |                                                                                                                                                                    |
| Ehrensaft, D. and A. C. Tishelman (2021). "Take the T out, put the T in: Gender-affirming hormones in youth." <u>Andrology</u> 9(6): 1698-1706.                                                                                                                          | Not relevant Design: review article                                                                                                                                |
| Elkadi, J., et al. (2023). "Developmental Pathway Choices of Young People Presenting to a Gender Service with Gender Distress: A Prospective Follow-Up Study." <u>Children</u> 10(2).                                                                                    | Not relevant Design: case-cohort study                                                                                                                             |
| Expósito-Campos, P., et al. (2023). "Empirically supported affirmative psychological interventions for transgender and non-binary youth and adults: A systematic review." <u>Clinical Psychology Review</u> 100: 1-20.                                                   | Not relevant Design: review article                                                                                                                                |
| Gao, J. L., et al. (2023). Androgenetic alopecia incidence in transgender and gender diverse populations: A retrospective comparative cohort study. <u>Journal of the American Academy of Dermatology</u> , 89(3), 504-510.                                              | Not relevant population (only adults included)                                                                                                                     |
| Glintborg, D., et al. (2022). Gender affirming hormonal treatment in Danish transgender persons: A nationwide register-based study. <u>Andrology</u> , 10(5), 885-893.                                                                                                   | Not relevant design (cohort study, no comparison group)                                                                                                            |
| Glintborg, D., et al. (2022). Cardiovascular risk in Danish transgender persons: a matched historical cohort study. <u>European Journal of Endocrinology</u> , 187(3), 463-477.                                                                                          | Not relevant design (Historical register-based cohort study)<br>Not relevant population (mostly adults if not only adults included, only IQR of age given [18;29]) |
| Green, A. E., et al. (2022). Association of Gender-Affirming Hormone Therapy With Depression, Thoughts of Suicide, and Attempted Suicide Among Transgender and Nonbinary Youth. <u>Journal of Adolescent Health</u> , 70(4), 643-649.                                    | Not relevant design (online survey, no intervention within study)                                                                                                  |
| Grimstad, F., et al. (2021). Breakthrough Bleeding in Transgender and Gender Diverse Adolescents and Young Adults on Long-Term Testosterone. <u>Journal of Pediatric and Adolescent Gynecology</u> , 34(5), 706-716.                                                     | Not relevant design (retrospective cohort study, no intervention, no comparison group)                                                                             |
| Ghelani, R., et. (2020). Sudden sex hormone withdrawal and the effects on body composition in late pubertal adolescents with gender dysphoria. <u>Journal of Pediatric Endocrinology and Metabolism</u> , 33(1), 107-112.                                                | Not relevant design (no intervention, no comparison group)                                                                                                         |
| Harper, J., et al. (2021). How does hormone transition in transgender change body composition, muscle strength and haemoglobin? Systematic review with a focus on the implications for sport participation. <u>British journal of sports medicine</u> , 55(15), 865-872. | Not relevant design (systematic review)                                                                                                                            |
| Hodax, J. K., & DiVall, S. (2023). Gender-affirming endocrine care for youth with a nonbinary gender identity. <u>Therapeutic Advances in Endocrinology and Metabolism</u> , 14.                                                                                         | Not relevant design (narrative review)                                                                                                                             |
| Huang, C., et al. (2022). Managing Dermatologic Effects of Gender-Affirming Therapy in Transgender Adolescents. <u>Adolescent Health, Medicine and Therapeutics</u> , 13, 93-106.                                                                                        | Not relevant design (narrative review)                                                                                                                             |

|                                                                                                                                                                                                                                                                          |                                                                                                            |
|--------------------------------------------------------------------------------------------------------------------------------------------------------------------------------------------------------------------------------------------------------------------------|------------------------------------------------------------------------------------------------------------|
| Hughto, J. M. W., et al. (2020). Social and Medical Gender Affirmation Experiences Are Inversely Associated with Mental Health Problems in a U.S. Non-Probability Sample of Transgender Adults. <i>Archives of Sexual Behavior</i> , 49(7), 2635-2647.                   | Not relevant population (only adults included)<br>Not relevant design (online survey, no comparison group) |
| Kaltiala, R., et al. (2020). "Adolescent development and psychosocial functioning after starting cross-sex hormones for gender dysphoria." <i>74(3)</i> : 213–219.                                                                                                       | Full text paper not available                                                                              |
| Karalexi, M. A., et al. (2020). "Gender-affirming hormone treatment and cognitive function in transgender young adults: A systematic review and meta-analysis." <i>Psychoneuroendocrinology</i> 119.                                                                     | Not relevant Design, Review article, Not relevant population; participants > 18 years of age               |
| Karalexi, M. A., et al. (2022). "Cardiovascular outcomes in transgender individuals in Sweden after initiation of gender-affirming hormone therapy." <i>European Journal of Preventive Cardiology</i> 29(15): 2017-2026.                                                 | Not relevant population                                                                                    |
| Kim, H. H., et al. (2023). "Psychopharmacological Considerations for Gender-Affirming Hormone Therapy." <i>Harvard Review of Psychiatry</i> 31(4): 183-194.                                                                                                              | Not relevant Design: Review article                                                                        |
| Klaver, M., et al. (2020). "Hormonal Treatment and Cardiovascular Risk Profile in Transgender Adolescents." 145(3).                                                                                                                                                      | Not relevant population                                                                                    |
| Kotamarti, V. S., et al. (2021). "Risk for venous thromboembolism in transgender patients undergoing cross-sex hormone treatment: A systematic review." <i>Journal of Sexual Medicine</i> 18(7): 1280-1291.                                                              | Not relevant Design; review article                                                                        |
| Kuper, L. E., et al. (2020). "Body Dissatisfaction and Mental Health Outcomes of Youth on Gender-Affirming Hormone Therapy." 145(4).                                                                                                                                     | Not relevant Design: review article                                                                        |
| Latham, A. (2022). "Puberty Blockers for Children: Can They Consent?" <i>The New bioethics : a multidisciplinary journal of biotechnology and the body</i> 28(3): 268-291.                                                                                               | Not relevant Design: review article                                                                        |
| Laurenzano, S. E., et al. (2021). "Subcutaneous Testosterone Is Effective and Safe as Gender-Affirming Hormone Therapy in Transmasculine and Gender-Diverse Adolescents and Young Adults: A Single Center's 8-Year Experience." <i>Transgender Health</i> 6(6): 343-352. | Not relevant Design: Observational study, No comparison group                                              |
| Millington, K., et al. (2022). "The effect of gender-affirming hormone treatment on serum creatinine in transgender and gender-diverse youth: implications for estimating GFR." <i>Pediatric Nephrology</i> 37(9): 2141-2150.                                            | Not relevant design: observational study                                                                   |
| Moussaoui, D., et al. (2022). "Pelvic pain in transmasculine adolescents receiving testosterone therapy." <i>International Journal of Transgender Health</i> .                                                                                                           | Not relevant Design: retrospective observational study                                                     |
| Mullins, E. S., et al. (2021). "Thrombosis risk in transgender adolescents receiving gender-affirming hormone therapy." <i>Pediatrics</i> 147(4).                                                                                                                        | Not relevant Design: retrospective observational study                                                     |
| Nguyen, H. V., et al. (2021). "Elevated Intracranial Pressure Associated With Exogenous Hormonal Therapy Used for Gender Affirmation." <i>Journal of Neuro-Ophthalmology</i> 41(2): 217–223.                                                                             | Not relevant population; participants > 18 years of age                                                    |
| Nolan, B. J., et al. (2021). "Prevalence of polycythaemia with different formulations of                                                                                                                                                                                 | Not relevant population; participants > 18 years of age                                                    |

|                                                                                                                                                                                                                                                     |                                                                                                                                  |
|-----------------------------------------------------------------------------------------------------------------------------------------------------------------------------------------------------------------------------------------------------|----------------------------------------------------------------------------------------------------------------------------------|
| testosterone therapy in transmasculine individuals." <u>Internal Medicine Journal</u> 51(6): 873–878.                                                                                                                                               |                                                                                                                                  |
| Olsavsky, A. L., et al. (2023). "Associations Among Gender-Affirming Hormonal Interventions, Social Support, and Transgender Adolescents' Mental Health." <u>Journal of Adolescent Health</u> 72(6): 860–868.                                       | Not relevant population: age at beginning of treatment not reported                                                              |
| Pallotti, F., et al. (2023). "Safety of gender affirming treatment in assigned female at birth transgender people and association of androgen and estrogen $\beta$ receptor polymorphisms with clinical outcomes." <u>Endocrine</u> 81(3): 621–630. | Not relevant population; participants > 18 years of age                                                                          |
| Saito, N., et al. (2021). "Gender-affirming hormone treatment causes changes in gender phenotype in a 12-lead electrocardiogram." <u>Heart Rhythm</u> 18(7): 1203–1209.                                                                             | Not relevant population; participants > 18 years of age                                                                          |
| Scheres, L. J. J., et al. (2021). "Effect of gender-affirming hormone use on coagulation profiles in transmen and transwomen." 19(4): 1029–1037.                                                                                                    | Not relevant population; participants > 18 years of age                                                                          |
| Spurny-Dworak, B., et al. (2022). "Effects of sex hormones on brain GABA and glutamate levels in a cis- and transgender cohort." <u>Psychoneuroendocrinology</u> 138.                                                                               | Not relevant population; participants > 18 years of age                                                                          |
| Suppakitjanusant, P., et al. (2020). "Effects of gender affirming hormone therapy on body mass index in transgender individuals: A longitudinal cohort study." <u>Journal of Clinical and Translational Endocrinology</u> 21.                       | Not relevant population; participants > 18 years of age                                                                          |
| Totaro, M., et al. (2021). "Risk of Venous Thromboembolism in Transgender People Undergoing Hormone Feminizing Therapy: A Prevalence Meta-Analysis and Meta-Regression Study." 12: 741866.                                                          | Not relevant design:<br>Prevalence meta-analysis and meta-regression study                                                       |
| Turban, J. L., et al. (2022). "Access to gender-affirming hormones during adolescence and mental health outcomes among transgender adults." <u>PLoS ONE</u> 17(1 January).                                                                          | Not relevant design:<br>Observational trial; no comparison group (with at least no intervention)                                 |
| Valentine, A., et al. (2021). "Cardiometabolic Parameters among Transgender Adolescent Males on Testosterone Therapy and Body Mass Index-Matched Cisgender Females." <u>Transgender Health</u> 6(6): 369–373.                                       | Not relevant population; also participants > 18 years of age; age range: 14-21 and results not separately reported for <18 years |

### X.3 PB

| Study reference                                                                                                                                                    | Reason for exclusion                         |
|--------------------------------------------------------------------------------------------------------------------------------------------------------------------|----------------------------------------------|
| Barbi, L. and G. Tornese (2021). "Puberty blockers in gender dysphoria: an international perspective." <u>Archives of Disease in Childhood</u> 107(11): 1002-1003. | Not relevant design:<br>Review article       |
| Barbi, L. and G. Tornese (2023). "Ethical dilemmas of gonadotropin-releasing hormone analogs for the treatment of gender dysphoria." 48(1): 1–3.                   | Not relevant design:<br>Editorial            |
| Biggs, M. (2020). "Puberty blockers and suicidality in adolescents suffering from gender dysphoria." <u>Archives of Sexual Behavior</u> 49(7): 2227-2229.          | Not relevant design:<br>Letter to the Editor |
| Biggs, M. (2020). "Gender dysphoria and psychological functioning in adolescents treated with                                                                      | Not relevant design:<br>Letter to the Editor |



|                                                                                                                                                                                                                                       |                                                                                               |
|---------------------------------------------------------------------------------------------------------------------------------------------------------------------------------------------------------------------------------------|-----------------------------------------------------------------------------------------------|
| GnRHa: Comparing Dutch and English prospective studies." Archives of Sexual Behavior 49(7): 2231-2236.                                                                                                                                |                                                                                               |
| Biggs, M. (2021). "Erratum: Correction to: Puberty Blockers and Suicidality in Adolescents Suffering from Gender Dysphoria (Archives of sexual behavior (2020) 49 7 (2227-2229))." Archives of Sexual Behavior 50(4): 1845.           | Not relevant design: Erratum/Correction                                                       |
| Biggs, M. (2021). "Puberty blockers and suicidality in adolescents suffering from gender dysphoria: Correction." Archives of Sexual Behavior 50(4): 1845-1845.                                                                        | Not relevant design: Correction                                                               |
| Biggs, M. (2021). "Revisiting the effect of GnRH analogue treatment on bone mineral density in young adolescents with gender dysphoria." 34(7): 937-939.                                                                              | Not relevant design: Letter to the Editor                                                     |
| Brik, T., et al. (2020). "Trajectories of Adolescents Treated with Gonadotropin-Releasing Hormone Analogues for Gender Dysphoria." 49(7): 2611-2618.                                                                                  | Not relevant design: Observational trial; no comparison group (with at least no intervention) |
| Carmichael, P., et al. (2021). "Short-term outcomes of pubertal suppression in a selected cohort of 12 to 15 year old young people with persistent gender dysphoria in the UK." PLoS ONE 16(2 February).                              | Not relevant design: Observational trial; no comparison group (with at least no intervention) |
| Clayton, A., et al. (2022). "Commentary: The Signal and the Noise—questioning the benefits of puberty blockers for youth with gender dysphoria—a commentary on Rew et al. (2021)." Child and Adolescent Mental Health 27(3): 259-262. | Not relevant design: Commentary                                                               |
| Eitel, K. B., et al. (2023). "Leuprolide Acetate for Puberty Suppression in Transgender and Gender Diverse Youth: A Comparison of Subcutaneous Eligard Versus Intramuscular Lupron." Journal of Adolescent Health 72(2): 307-311.     | Not relevant Design: Observational trial; comparing only treatment-groups                     |
| Hobson, et al. (2022). Transgender Youth Experiences with Implantable GnRH Agonists for Puberty Suppression. Transgender Health, 7(4), 364-368.                                                                                       | Not relevant design (descriptive study, no comparison group)                                  |
| Hoffman, N. D., & Alderman, E. M. (2021). Improving Our Understanding of Medical Decision-Making Competence in Puberty Suppression. Pediatrics, 148(6).                                                                               | Not relevant design (commentary)                                                              |
| Horton, C. (2022). "I Didn't Want Him to Disappear" Parental Decision-Making on Access to Puberty Blockers for Trans Early Adolescents. The Journal of Early Adolescence, 43(4), 490-515.                                             | Not relevant design (cohort study, no comparison group)                                       |
| Klein, D. A., et al. (2022). "Puberty Suppression in Transgender and Gender-Diverse Adolescents: Timely Care for Optimal Outcomes." Transgender Health 7(3): 185-188.                                                                 | Not relevant Design: review article                                                           |
| Kulesa, R. (2023). "Toward a Standard of Medical Care: Why Medical Professionals Can Refuse to Prescribe Puberty Blockers." The New bioethics : a multidisciplinary journal of biotechnology and the body 29(2): 139-155.             | Not relevant Design (commentary)                                                              |
| Karamanis, G., et al. (2023). "Incidence of Idiopathic Intracranial Hypertension in Individuals With Gonadotropin-Releasing Hormone Analogue Treatment for Gender Dysphoria in Sweden." 177(7): 726-727.                              | Not relevant population (age)                                                                 |

|                                                                                                                                                                                                                                            |                                                                                               |
|--------------------------------------------------------------------------------------------------------------------------------------------------------------------------------------------------------------------------------------------|-----------------------------------------------------------------------------------------------|
| Lee, W. G., et al. (2023). "Urological and Gynaecological Considerations for the Use of Gonadotropin-releasing Hormone Analogues in Transgender and Nonbinary Adolescents: A Narrative Review." <u>European Urology Focus</u> 9(1): 35-41. | Not relevant Design: review article                                                           |
| McPherson, S. and D. E. P. Freedman (2023). Psychological outcomes of 12-15-year-olds with gender dysphoria receiving pubertal suppression: assessing reliable and clinically significant change.                                          | Not relevant design (no comparison group)                                                     |
| Mejia-Otero, J. D., et al. (2021). "Effectiveness of Puberty Suppression with Gonadotropin-Releasing Hormone Agonists in Transgender Youth." <u>Transgender Health</u> 6(1): 31-35.                                                        | Not relevant comparison group: Central precocious puberty                                     |
| Nasomyont, N., et al. (2022). "Changes in Bone Marrow Adipose Tissue in Transgender and Gender Non-Conforming Youth Undergoing Pubertal Suppression: A Pilot Study." <u>Journal of Clinical Densitometry</u> 25(4): 485-489.               | Not relevant Design: Small n, only descriptive values reported                                |
| Navabi, B., et al. (2021). "Pubertal suppression, bone mass, and body composition in youth with gender dysphoria." <u>Pediatrics</u> 148(4).                                                                                               | Not relevant outcome; age at beginning of treatment unknown                                   |
| Ni, J., et al. (2023). "Review of implant gonadotrophin-releasing hormone agonist use: experience in a single academic center." <u>Hormone research in paediatrics</u> .                                                                   | Not relevant outcome                                                                          |
| Nokoff, N. J., et al. (2021). "Body Composition and Markers of Cardiometabolic Health in Transgender Youth on Gonadotropin-Releasing Hormone Agonists." <u>Transgender Health</u> 6(2): 111-119.                                           | Not relevant outcome                                                                          |
| Olson-Kennedy, J., et al. (2021). "Histrelin Implants for Suppression of Puberty in Youth with Gender Dysphoria: A Comparison of 50 mcg/Day (Vantas) and 65 mcg/Day (SupprelinLA)." <u>Transgender Health</u> 6(1): 36-42.                 | Not relevant outcome                                                                          |
| Turban, J. L., et al. (2020). "Pubertal suppression for transgender youth and risk of suicidal ideation." <u>Pediatrics</u> 145(2).                                                                                                        | Not relevant design: Observational trial; no comparison group (with at least no intervention) |
