# Supplementary material for: Beyond NICE: Aktualisierte systematische Übersicht zur Evidenzlage der Pubertätsblockade und Hormongabe bei Minderjährigen mit Geschlechtsdysphorie
Source: Atypon-hosted journal article supplement (doi:10.1024/1422-4917/a000972), 2024-02-27
Supplement: 1422-4917_a000972_esm5.pdf [file 1422-4917_a000972_esm5.pdf]

**SUPPLEMENTARY ONLINE MATERIALS IV**

**Table 1: Question 1. For children and adolescents with gender dysphoria, what is the clinical effectiveness of treatment with GnRH analogues compared with one or a combination of psychological support, social transitioning to the desired gender or no intervention? – mental health, body image**

| QUALITY                                                                                                                                                                                                                                                |                                       |                         |                |                | Summary of findings                |            |                                                                                                                                                                                  | IMPORTANCE | CERTAINTY |
|--------------------------------------------------------------------------------------------------------------------------------------------------------------------------------------------------------------------------------------------------------|---------------------------------------|-------------------------|----------------|----------------|------------------------------------|------------|----------------------------------------------------------------------------------------------------------------------------------------------------------------------------------|------------|-----------|
|                                                                                                                                                                                                                                                        |                                       |                         |                |                | No of events/No of patients (n/N%) | Effect     |                                                                                                                                                                                  |            |           |
| Study                                                                                                                                                                                                                                                  | Risk of bias                          | Indirectness            | Inconsistency  | Imprecision    | Intervention                       | Comparator | Result                                                                                                                                                                           |            |           |
| <b><i>Impact on neuronal activation patterns</i></b>                                                                                                                                                                                                   |                                       |                         |                |                |                                    |            |                                                                                                                                                                                  |            |           |
| <b><i>Mean ACC response to caregiver/peer angry/happy voices in gender dysphoria youth receiving gender affirming hormone treatment through testosterone administration (GAH+) vs. no gender dysphoria youth not receiving testosterone (GAH-)</i></b> |                                       |                         |                |                |                                    |            |                                                                                                                                                                                  |            |           |
| 1 study Morningstar et al 2023                                                                                                                                                                                                                         | Very serious limitations <sup>1</sup> | No serious indirectness | Not applicable | Not calculable | N=19                               | N=25       | Significant 3-way-interaction (group x speaker x emotion): GAH+ loss less response to angry caregiver vs peer voice, GAH- showed less response to happy caregiver vs. peer voice | Low        | LOW       |
| <b><i>Impact on mental health</i></b>                                                                                                                                                                                                                  |                                       |                         |                |                |                                    |            |                                                                                                                                                                                  |            |           |
| <b><i>Mean depression (CDI)-Score in gender dysphoria youth receiving gender affirming testosterone administration</i></b>                                                                                                                             |                                       |                         |                |                |                                    |            |                                                                                                                                                                                  |            |           |
| 1 study Grannis et al 2021                                                                                                                                                                                                                             | Very serious limitations <sup>2</sup> | No serious indirectness | Not applicable | Not calculable | N=19                               | N=23       | Sig. lower in Intervention Group $F(1,39) = 7.39, p = 0.01, \eta^2 = 0.16$                                                                                                       | Critical   | LOW       |
| <b><i>Mean Suicidality (SBQ-R)-Score</i></b>                                                                                                                                                                                                           |                                       |                         |                |                |                                    |            |                                                                                                                                                                                  |            |           |
| 1 study Grannis et al 2021                                                                                                                                                                                                                             | Very serious limitations <sup>2</sup> | No serious indirectness | Not applicable | Not calculable | N=19                               | N=23       | No sig. differences<br>Past year: $F(1,39) = 3.85, p = 0.06, \eta^2 = 0.09$ .<br>Lifetime: $F(1,39) = 1.25, p = 0.27, \eta^2 = 0.03$                                             | Critical   | LOW       |
| <b><i>Mean generalized anxiety (SCARED)-Score</i></b>                                                                                                                                                                                                  |                                       |                         |                |                |                                    |            |                                                                                                                                                                                  |            |           |

|                                          |                                       |                         |                |                |      |      |                                                                                                |          |     |
|------------------------------------------|---------------------------------------|-------------------------|----------------|----------------|------|------|------------------------------------------------------------------------------------------------|----------|-----|
| 1 study<br>Grannis et al 2021            | Very serious limitations <sup>2</sup> | No serious indirectness | Not applicable | Not calculable | N=19 | N=23 | Sig. lower in Intervention Group<br>$F(1,39) = 6.99, p = 0.01, \eta^2 = 0.16$                  | Critical | LOW |
| <b>Mean social anxiety (LSAS)-Score</b>  |                                       |                         |                |                |      |      |                                                                                                |          |     |
| 1 study<br>Grannis et al 2021            | Very serious limitations <sup>2</sup> | No serious indirectness | Not applicable | Not calculable | N=19 | N=23 | Sig. lower in Intervention Group<br>$F(1,39) = 17.21, p < 0.001, \eta^2 = 0.32$                | Critical | LOW |
| <b>Impact on body image</b>              |                                       |                         |                |                |      |      |                                                                                                |          |     |
| <b>Mean body-image-scale (BSI)-Score</b> |                                       |                         |                |                |      |      |                                                                                                |          |     |
| 1 study<br>Grannis et al 2021            | Very serious limitations <sup>2</sup> | No serious indirectness | Not applicable | Not calculable | N=19 | N=23 | Sig. lower dissatisfaction in Intervention Group<br>$F(1,39) = 10.47, p < 0.01, \eta^2 = 0.21$ | Critical | LOW |

<sup>1</sup>Very high risk of bias (lack of randomization, lack of blinding, lack of reports of baseline-testosterone-level, highly skewed variations in exogenous hormone doses and administration duration).

<sup>2</sup>Very high risk of bias (lack of randomization, lack of blinding, possible bias due to self-reported outcome measures and knowledge about treatment).
